# Supplementary material for: Strong mechanical anisotropy and an anisotropic Dirac state in 2D C5N3
Source: Royal Society of Chemistry journal article supplement (doi:10.1039/d4cp00608a), 2024-01-01
Supplement: d4cp00608a1.pdf [file d4cp00608a1.pdf]

## Supporting Information

### Strong mechanical anisotropy and an anisotropic Dirac state in two-dimensional $C_5N_3$

Rui Tan,<sup>a</sup> Xueqing Chen,<sup>a</sup> Liyufen Dai,<sup>b</sup> Yulou Ouyang,<sup>a</sup> Liemao Cao,<sup>a</sup> Zhenkun Tang,<sup>a</sup>  
Ming Ma,<sup>b</sup> Xiaolin Wei,<sup>\*a</sup> and Gaokuo Zhong<sup>\*b</sup>

<sup>a</sup>*The Key Laboratory of Micro-nano Energy Materials and Application Technologies,  
University of Hunan Province & College of Physics and Electronics Engineering,  
Hengyang Normal University, Hengyang 421002, China.*

<sup>b</sup>*Shenzhen Institute of Advanced Technology, Chinese Academy of Sciences,  
Shenzhen, Guangdong 518055, China*

**\*Corresponding Authors:** [xlw@xtu.edu.cn](mailto:xlw@xtu.edu.cn); [gk.zhong@siat.ac.cn](mailto:gk.zhong@siat.ac.cn)

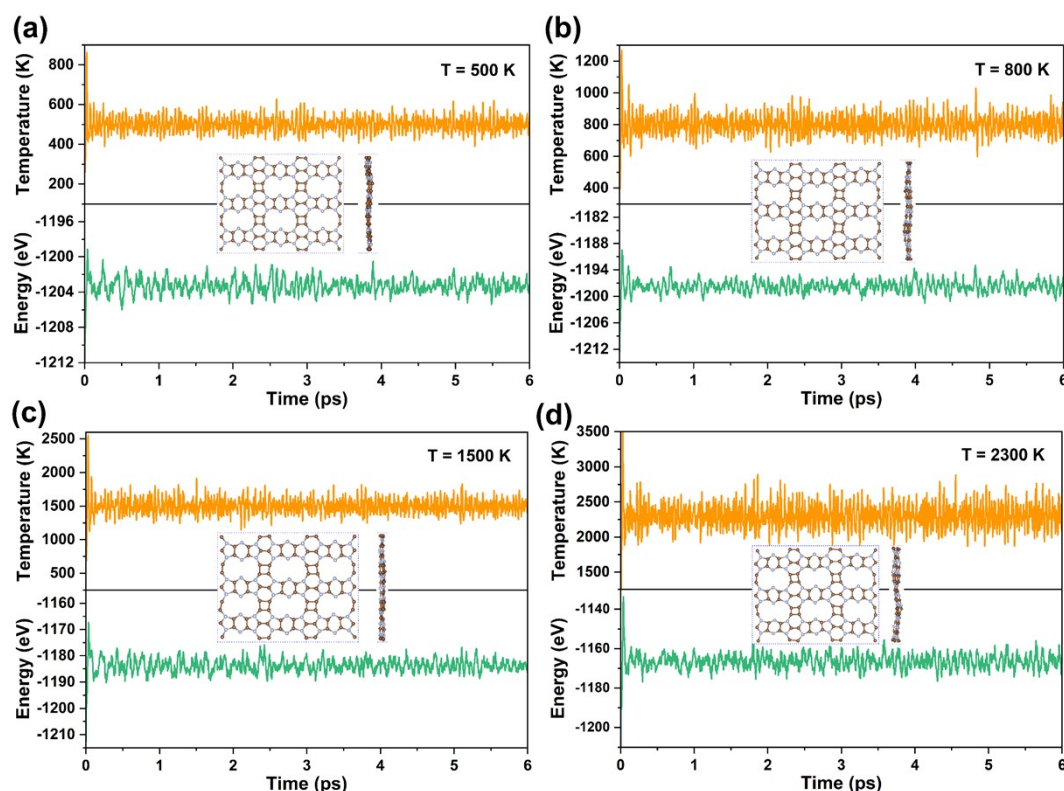

Fig. S1: Temperature and total energy fluctuations of the TPH-C<sub>5</sub>N<sub>3</sub> monolayer throughout the AIMD simulation at temperatures of (a) 500 K, (b) 800 K, (c) 1000 K, and (d) 2300 K. Insets display the atomic configurations of TPH-C<sub>5</sub>N<sub>3</sub> at these respective temperatures (500, 800, 1500, and 2300 K).

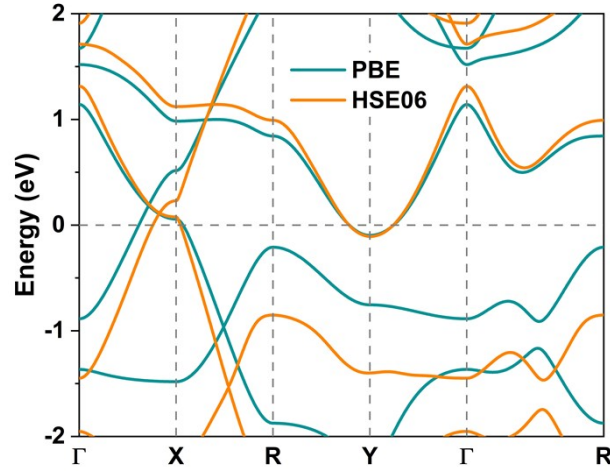

Fig. S2: Band structures of TPH-C<sub>5</sub>N<sub>3</sub> monolayer calculated using the PBE (green lines) and HSE06 (yellow lines) functionals.

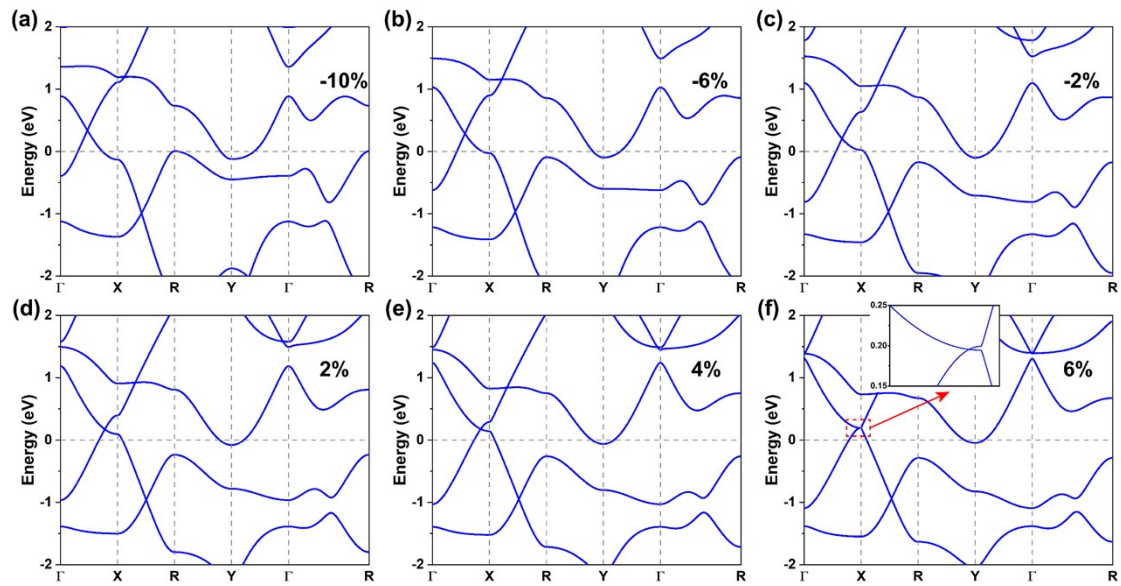

Fig. S3: The effect of uniaxial strain along the *a* axis on the Dirac state of TPH-C<sub>5</sub>N<sub>3</sub> in the PBE functional.

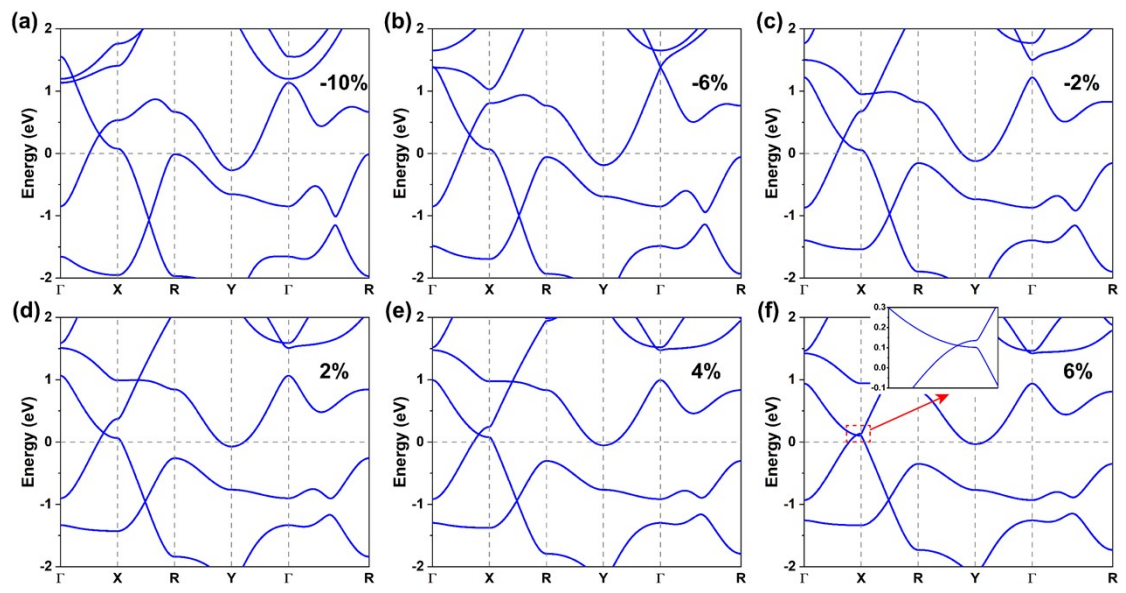

Fig. S4: The effect of biaxial strain on the Dirac state of TPH-C<sub>5</sub>N<sub>3</sub> in the PBE functional.
